# Supplementary material for: Structural Investigation of DHICA Eumelanin Using Density Functional Theory and Classical Molecular Dynamics Simulations
Source: MDPI journal article supplement (doi:10.3390/molecules27238417), 2022-12-01
Supplement: s1 [file s1]

# SUPPORTING INFORMATION

## Structural investigation of DHICA eumelanin using density functional theory and classical molecular dynamics simulations

Sepideh Soltani,<sup>†</sup> Shahin Sowlati-Hashjin,<sup>‡</sup> Conrard Giresse Tetsassi Feugmo,<sup>¶</sup>  
and Mikko Karttunen<sup>\*,†,§</sup>

<sup>†</sup>*Department of Physics and Astronomy, The University of Western Ontario, 1151 Richmond  
Street, London, Ontario N6A 3K7, Canada*

<sup>‡</sup>*Institute of Biomedical Engineering, University of Toronto, Toronto, Ontario M5S 3G9,  
Canada*

<sup>¶</sup>*Department of Chemistry, University of Waterloo, 200 University Ave. West, Waterloo,  
Ontario N2 3G1, Canada*

<sup>§</sup>*Department of Chemistry, The University of Western Ontario, 1151 Richmond Street,  
London, Ontario N6A 5B7, Canada*

E-mail: mkarttu@uwo.ca

Molecular structure of the DHICA monomer was geometry-optimized by DFT calculations using Gaussian 09 (Ref. [64] in the main manuscript). The atom types and coordinates are shown in Table S1. The bond lengths and angles evaluated by Okuda (Ref. [54] in the main manuscript) and Powell (Ref. [48] in the main manuscript) are provided in Tables S2 and S3, respectively, for reference. As the tables show, the results are in good agreement.

The average difference between the DFT calculations and MD simulations after energy minimization was 1.42% for the bond lengths and 1.37% for the angles.

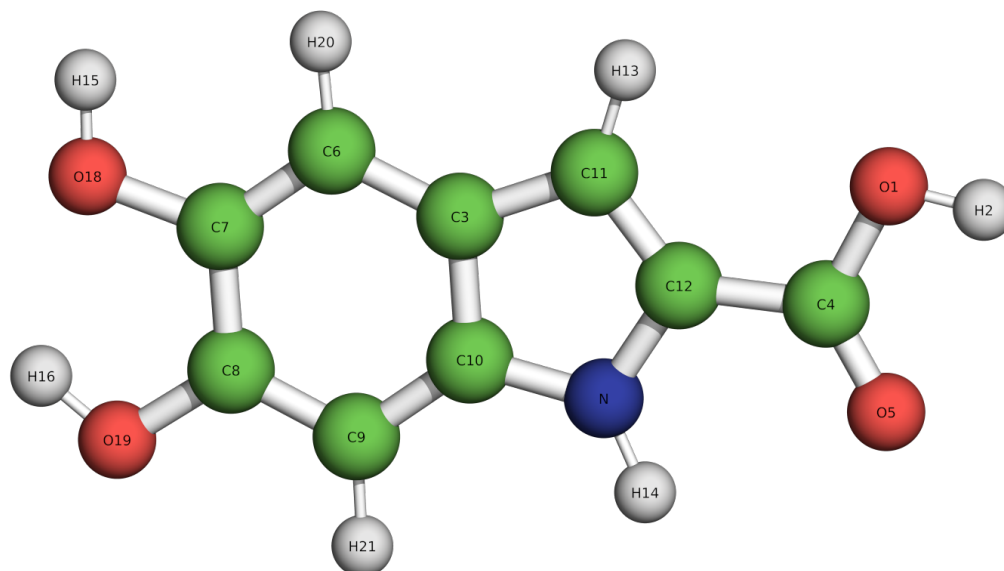

Figure S1: DHICA monomeric structure

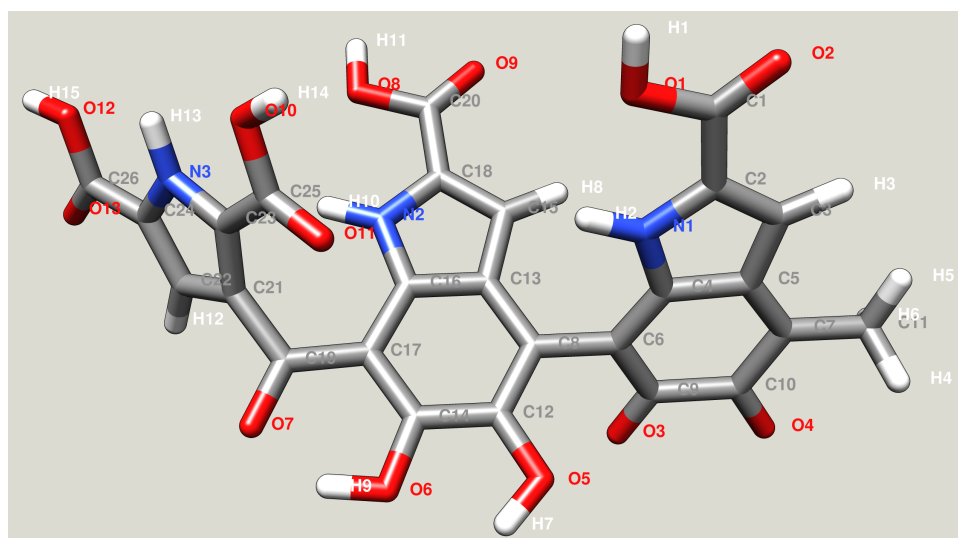

Figure S2: Eumelanin chemical structures which serve as DHICA-eumelanin model structure in this article

Table S1: Atom types and coordinates (unit: Å) of DHICA monomer optimized using DFT calculation.

|    | Atom Name | X(Å)     | Y (Å)    | Z(Å)     |
|----|-----------|----------|----------|----------|
| 1  | O         | 3.95050  | 1.22780  | 0.18430  |
| 2  | H         | 4.90800  | 1.02960  | 0.21480  |
| 3  | C         | -0.24050 | 0.71090  | 0.05100  |
| 4  | C         | 3.37930  | 0.00790  | 0.15880  |
| 5  | O         | 4.05530  | -1.00850 | 0.17490  |
| 6  | C         | -1.49980 | 1.34660  | 0.01700  |
| 7  | C         | -2.64300 | 0.54800  | -0.01660 |
| 8  | C         | -2.55020 | -0.84070 | -0.01740 |
| 9  | C         | -1.32280 | -1.49360 | 0.01470  |
| 10 | C         | -0.18110 | -0.68370 | 0.04900  |
| 11 | C         | 1.10070  | 1.18210  | 0.09130  |
| 12 | C         | 1.94930  | 0.08900  | 0.11420  |
| 13 | H         | 1.41910  | 2.21710  | 0.10390  |
| 14 | H         | 1.50030  | -1.97960 | 0.09340  |
| 15 | H         | -3.80190 | 2.06470  | -0.04390 |
| 16 | H         | -4.41520 | -0.93560 | -0.06750 |
| 17 | N         | 1.14900  | -1.03070 | 0.08590  |
| 18 | O         | -3.89810 | 1.09680  | -0.04940 |
| 19 | O         | -3.69200 | -1.59380 | -0.05010 |
| 20 | H         | -1.55840 | 2.42880  | 0.01820  |
| 21 | H         | -1.26470 | -2.57600 | 0.01370  |

Table S2: Comparison of bond lengths (Å) calculated using DFT for the DHICA monomer in this paper and in the papers of Okuda (Ref. [54] in the main manuscript) and Powell (Ref. [48] in the main manuscript).

| Bond    | Present  | Okuda | Powell |
|---------|----------|-------|--------|
| O1-C4   | 1.354040 | 1.356 | 1.368  |
| O5-C4   | 1.214197 | 1.221 | 1.225  |
| C6-C3   | 1.411795 | 1.414 | 1.414  |
| C3-C10  | 1.424280 | 1.403 | 1.403  |
| C3-C11  | 1.423073 | 1.425 | 1.421  |
| C4-C12  | 1.454581 | 1.456 | 1.453  |
| C6-C7   | 1.374746 | 1.378 | 1.380  |
| C7-C8   | 1.424782 | 1.427 | 1.428  |
| C8-C9   | 1.380375 | 1.384 | 1.387  |
| C9-C10  | 1.401056 | 1.403 | 1.403  |
| C10-N17 | 1.368609 | 1.370 | 1.372  |
| C7-O18  | 1.380508 | 1.380 | 1.384  |
| C8-O19  | 1.359174 | 1.361 | 1.365  |

Table S3: Comparison of bond angles (deg.) calculated using DFT for the DHICA monomer in this paper with the results of Okuda (Ref. [54] in the main manuscript)) and Powell (Ref. [48] in the main manuscript).

| Bond        | Present | Okuda | Powell |
|-------------|---------|-------|--------|
| C6-C3-C10   | 118.9   | 118.9 | 119.3  |
| C6-C3-C11   | 134.0   | 134.0 | 133.5  |
| C10-C3-C11  | 107.1   | 107.1 | 107.2  |
| O1-C4-C5    | 122.7   | 122.8 | 112.8  |
| O1-C4-C12   | 113.1   | 113.3 | 112.9  |
| O5-C4-C12   | 124.2   | 123.9 | 124.2  |
| C3-C6-C7    | 118.6   | 118.6 | 118.3  |
| C6-C7-C8    | 121.7   | 121.8 | 121.7  |
| C6-C7-O18   | 124.9   | 124.8 | 124.8  |
| C8-C7-O18   | 113.4   | 113.4 | 113.6  |
| C7-C8-C9    | 120.8   | 120.9 | 121.2  |
| C7-C8-O19   | 119.2   | 119.1 | 118.9  |
| C9-C8-O19   | 120.0   | 120.0 | 119.8  |
| C8-C9-C10   | 117.6   | 117.4 | 117.2  |
| C3-C10-C9   | 122.3   | 122.4 | 122.3  |
| C3-C10-N17  | 107.4   | 107.4 | 107.3  |
| C9-C10-N17  | 130.3   | 130.2 | 130.5  |
| C3-C11-C12  | 107.0   | 107.0 | 107.0  |
| C4-C12-C11  | 132.3   | 132.6 | 132.0  |
| C4-C12-N17  | 118.5   | 118.2 | 118.9  |
| C11-C12-N17 | 109.1   | 109.2 | 109.1  |
| C10-N17-C12 | 109.3   | 109.3 | 109.4  |

Table S4: Calculated vibrational wave numbers and IR intensities for the DHICA monomer in the current article. Only vibrational modes of the main functional groups are tabulated (larger than 1000  $\text{cm}^{-1}$ ). For the labels of the atoms, see Fig. 1. The following abbreviations are used:  $\nu$ , stretching;  $\delta$ , in-plane bending; Skel., Skeleton; def., deformation.

| Wavenumber<br>present ( $\text{cm}^{-1}$ ) | IR Intensity<br>( $\text{km mol}^{-1}$ ) | Vibrational<br>modes                                                                                                                       |
|--------------------------------------------|------------------------------------------|--------------------------------------------------------------------------------------------------------------------------------------------|
| 3852.9                                     | 80.9                                     | $\nu\text{O18H15}$                                                                                                                         |
| 3779.5                                     | 146.2                                    | $\nu\text{O19H16}$                                                                                                                         |
| 3773.3                                     | 135.0                                    | $\nu\text{O1H2}$                                                                                                                           |
| 3653.7                                     | 103.1                                    | $\nu\text{N17H14}$                                                                                                                         |
| 3253.6                                     | 0.5                                      | $\nu\text{C11H13}$                                                                                                                         |
| 3196.5                                     | 2.9                                      | $\nu\text{C9H21}$                                                                                                                          |
| 3159.1                                     | 14.6                                     | $\nu\text{C6H20}$                                                                                                                          |
| 1777.5                                     | 569.6                                    | $\nu\text{O5C4}$ , $\delta\text{O1H2}$                                                                                                     |
| 1686.3                                     | 22.8                                     | Benzene breathing,<br>$\delta\text{C9H21}$ , $\delta\text{C6H20}$ , $\delta\text{O19H16}$                                                  |
| 1629.6                                     | 11.3                                     | Benzene breathing, $\delta\text{O18H15}$ ,<br>Pyrrole def., $\delta\text{N17H14}$ , $\delta\text{O19H16}$                                  |
| 1574.8                                     | 267.8                                    | Skel. def., $\delta\text{O19H16}$ , $\delta\text{O1H2}$                                                                                    |
| 1556.2                                     | 63.9                                     | $\delta\text{O18H15}$ , $\delta\text{O19H16}$ , Skel. def., $\delta\text{N17H14}$                                                          |
| 1507.9                                     | 15.1                                     | Benzene breath., Pyrrole breath.<br>$\delta\text{C9H21}$ , $\delta\text{N17H14}$ , $\delta\text{C6H20}$ , $\delta\text{O19H16}$            |
| 1451.3                                     | 112.8                                    | Pyrrole def., $\nu\text{N17C12}$ , $\delta\text{O19H16}$ ,<br>$\delta\text{C9H21}$ , $\delta\text{N17H14}$                                 |
| 1429.0                                     | 2.9                                      | $\delta\text{N17C12}$ , $\delta\text{O19H16}$ , $\delta\text{O1H2}$                                                                        |
| 1390.8                                     | 14.2                                     | Benzene breathing, $\nu\text{N17C10}$ , $\delta\text{N17C12}$ ,<br>$\delta\text{C9H21}$ , $\delta\text{C6H20}$ , $\delta\text{O19H16}$     |
| 1375.0                                     | 17.6                                     | $\delta\text{O18H15}$ , $\delta\text{O19H16}$ , $\delta\text{C9H21}$ , $\delta\text{C6H20}$                                                |
| 1342.1                                     | 360.5                                    | Pyrrole breathing, $\delta\text{O1H2}$ ,<br>$\delta\text{O1H2}$ , $\delta\text{O19H16}$ ,                                                  |
| 1266.8                                     | 235.0                                    | $\delta\text{N17C12}$ , $\delta\text{O19H16}$ , $\delta\text{C11H13}$ , $\delta\text{O1H2}$                                                |
| 1249.3                                     | 67.6                                     | Skel. def., $\delta\text{O19H16}$ , $\delta\text{C9H21}$ , $\delta\text{C6H20}$                                                            |
| 1232.0                                     | 82.7                                     | Skel. def., $\delta\text{O19H16}$ , $\delta\text{C9H21}$ ,<br>$\delta\text{O1H2}$ , $\delta\text{O18H15}$ , $\delta\text{C6H20}$           |
| 1200.6                                     | 185.4                                    | $\delta\text{O19H16}$ , $\delta\text{C11H13}$ , $\delta\text{C9H21}$<br>$\delta\text{O1H2}$ , $\delta\text{O18H15}$ , $\delta\text{C6H20}$ |
| 1180.6                                     | 25.1                                     | Benzene breathing, $\delta\text{O1H2}$<br>$\delta\text{C9H21}$ , $\delta\text{C6H20}$ , $\delta\text{O18H15}$                              |
| 1157.9                                     | 530.2                                    | Benzene breathing, $\delta\text{N17H14}$ , $\delta\text{C11H13}$<br>$\delta\text{O1H2}$ , $\delta\text{O18H15}$ , $\delta\text{C6H20}$     |
| 1142.9                                     | 213.4                                    | Skel. def., $\delta\text{N17H14}$ , $\delta\text{O18H15}$                                                                                  |
| 1109.3                                     | 24.3                                     | Pyrrole def., $\delta\text{N17H14}$ , $\delta\text{O18H15}$                                                                                |

Table S5: Calculated molecular vibrational intensities for the DHICA monomer from Okuda's article (Ref. [54] in the main manuscript)).

| Wavenumber<br>( $\text{cm}^{-1}$ ) | IR Intensity<br>( $\text{km mol}^{-1}$ ) | Vibrational modes                                                                          |
|------------------------------------|------------------------------------------|--------------------------------------------------------------------------------------------|
| 3750.5                             | 68.0                                     | $\nu\text{O18H15}$                                                                         |
| 3680.7                             | 129.2                                    | $\nu\text{O19H16}$                                                                         |
| 3674.8                             | 116.7                                    | $\nu\text{O1H2}$                                                                           |
| 3579.9                             | 101.3                                    | $\nu\text{N17H14}$                                                                         |
| 3192.1                             | 0.7                                      | $\nu\text{C11H13}$                                                                         |
| 3138.0                             | 3.0                                      | $\nu\text{C9H21}$                                                                          |
| 3097.2                             | 15.0                                     | $\nu\text{C6H20}$                                                                          |
| 1749.9                             | 517.3                                    | $\nu\text{O5C4}$                                                                           |
| 1657.4                             | 23.4                                     | Benzene def.                                                                               |
| 1600.3                             | 9.5                                      | Skel. def.                                                                                 |
| 1549.4                             | 278.9                                    | Pyrrole breathing, Benzene def.                                                            |
| 1529.1                             | 68.2                                     | Skel. def., $\nu\text{C8O19}$                                                              |
| 1485.7                             | 11.1                                     | Skel. def., $\nu\text{C7O18}$                                                              |
| 1428.3                             | 124.4                                    | $\nu\text{N17C12}$                                                                         |
| 1406.9                             | 2.7                                      | Skel. def., $\nu\text{C4O1}$ , $\delta\text{O19H16}$                                       |
| 1371.3                             | 15.4                                     | Pyrrole def., Benzene breathing, $\nu\text{C8O19}$ , $\nu\text{C7O18}$                     |
| 1349.3                             | 9.3                                      | $\delta\text{O18H15}$ , $\delta\text{O19H16}$                                              |
| 1320.4                             | 435.8                                    | Skel. breathing, $\delta\text{O1H2}$ , $\nu\text{C8O19}$ , $\nu\text{C4O1}$                |
| 1243.4                             | 195.8                                    | $\delta\text{N17H14}$ , $\delta\text{C11H13}$ , $\nu\text{C8O19}$                          |
| 1226.0                             | 92.7                                     | $\delta\text{C6H20}$                                                                       |
| 1209.8                             | 54.5                                     | $\delta\text{O19H16}$ , $\delta\text{O1H2}$ , $\nu\text{C8O19}$ , Skel. def.               |
| 1176.3                             | 197.7                                    | $\delta\text{C9H21}$ , $\delta\text{O18H15}$ , $\delta\text{O19H16}$ , $\delta\text{O1H2}$ |
| 1157.8                             | 18.7                                     | $\delta\text{N17H14}$ , $\delta\text{C9H21}$                                               |
| 1137.3                             | 423.8                                    | $\delta\text{O1H2}$ , $\delta\text{C11H13}$ , $\nu\text{C4O1}$                             |
| 1121.5                             | 273.5                                    | $\delta\text{O18H15}$ , $\delta\text{N17H14}$ , $\nu\text{C7O18}$                          |
| 1092.7                             | 19.8                                     | $\delta\text{C11H13}$ , $\delta\text{N17H14}$ , $\nu\text{C4O1}$                           |

Table S6: Atom types and coordinates (unit:Å) of DHICA-eumelanin (dopachrome-DHICA-PTCA). The molecular structure is optimized using DFT calculations.

| Atom Name              | X        | Y        | Z        |
|------------------------|----------|----------|----------|
| H                      | -2.21913 | 4.42918  | -2.31489 |
| O                      | -2.34932 | 3.56601  | -1.90581 |
| C                      | -3.64513 | 3.48385  | -1.55653 |
| C                      | -3.94859 | 2.19151  | -0.91221 |
| O                      | -4.44611 | 4.35538  | -1.74681 |
| N                      | -2.98028 | 1.21241  | -0.72646 |
| C                      | -5.14571 | 1.79446  | -0.43531 |
| H                      | -2.01001 | 1.30505  | -0.97801 |
| C                      | -3.53568 | 0.13001  | -0.09518 |
| H                      | -6.05122 | 2.3769   | -0.46797 |
| C                      | -4.96281 | 0.46139  | 0.11203  |
| C                      | -2.93141 | -1.02804 | 0.27028  |
| C                      | -5.82843 | -0.39554 | 0.69383  |
| C                      | -1.50045 | -1.28096 | 0.03051  |
| C                      | -3.76273 | -2.02059 | 0.95424  |
| C                      | -5.28818 | -1.70571 | 1.1342   |
| C                      | -7.28113 | -0.13801 | 0.91714  |
| C                      | -1.09232 | -2.34522 | -0.73784 |
| C                      | -0.50369 | -0.42965 | 0.57667  |
| O                      | -3.34314 | -3.05519 | 1.40972  |
| O                      | -5.99622 | -2.541   | 1.63849  |
| H                      | -7.88117 | -0.88685 | 0.39324  |
| H                      | -7.57698 | 0.85391  | 0.57579  |
| Continued on next page |          |          |          |

**Table S6 – continued from previous page**

| Atom Name              | X        | Y        | Z        |
|------------------------|----------|----------|----------|
| H                      | -7.52313 | -0.23578 | 1.97863  |
| O                      | -1.99556 | -3.16263 | -1.31565 |
| C                      | 0.28931  | -2.58741 | -0.97244 |
| C                      | -0.59029 | 0.69928  | 1.43887  |
| C                      | 0.86096  | -0.66024 | 0.3225   |
| H                      | -1.51689 | -3.8843  | -1.7356  |
| O                      | 0.53716  | -3.66111 | -1.7256  |
| C                      | 1.29735  | -1.74708 | -0.4822  |
| H                      | -1.47837 | 1.15402  | 1.84766  |
| C                      | 0.69288  | 1.11063  | 1.67901  |
| N                      | 1.56756  | 0.28666  | 1.00215  |
| H                      | 1.51508  | -3.74854 | -1.79775 |
| C                      | 2.67326  | -2.02172 | -0.86864 |
| C                      | 1.153    | 2.22755  | 2.49645  |
| H                      | 2.56772  | 0.34688  | 1.08123  |
| C                      | 3.75924  | -1.04751 | -0.54942 |
| O                      | 2.99637  | -3.05694 | -1.44841 |
| O                      | 2.50528  | 2.32146  | 2.49522  |
| O                      | 0.44878  | 2.98876  | 3.10383  |
| C                      | 4.85888  | -1.31241 | 0.28813  |
| C                      | 3.92859  | 0.23822  | -1.05003 |
| H                      | 2.72822  | 3.06309  | 3.06833  |
| H                      | 5.05664  | -2.21909 | 0.83683  |
| C                      | 5.65294  | -0.1821  | 0.28742  |
| Continued on next page |          |          |          |



**Table S6 – continued from previous page**

| Atom Name | X       | Y        | Z        |
|-----------|---------|----------|----------|
| C         | 3.09372 | 0.99885  | -1.98507 |
| N         | 5.07987 | 0.74244  | -0.53008 |
| C         | 6.90951 | 0.05776  | 1.005    |
| O         | 3.60082 | 2.22988  | -2.19855 |
| O         | 2.08893 | 0.59529  | -2.50102 |
| H         | 5.45486 | 1.65649  | -0.73198 |
| O         | 7.39961 | 1.286    | 0.73877  |
| O         | 7.44164 | -0.72822 | 1.737    |
| H         | 3.01749 | 2.67186  | -2.82562 |
| H         | 8.2222  | 1.37703  | 1.23297  |

Table S7: Comparison of bond lengths calculated using DFT and MD simulations after energy minimization of DHICA-eumelanin.

| Bond                   | DFT(Å) | MD after EM (Å) | Diff% |
|------------------------|--------|-----------------|-------|
| H1-O1                  | 0.94   | 0.95            | -1.06 |
| O1-C1                  | 1.36   | 1.35            | 0.48  |
| C1-C2                  | 1.49   | 1.47            | 1.32  |
| C1-O2                  | 1.22   | 1.20            | 1.38  |
| C2-N1                  | 1.38   | 1.39            | -0.70 |
| C2-C3                  | 1.38   | 1.35            | 2.30  |
| N1-H2                  | 1.02   | 1.01            | 0.88  |
| N1-C4                  | 1.38   | 1.37            | 0.43  |
| C3-H3                  | 1.08   | 1.08            | 0.28  |
| C3-C5                  | 1.43   | 1.45            | -1.61 |
| C4-C5                  | 1.40   | 1.47            | -4.73 |
| C4-C6                  | 1.34   | 1.36            | 2.28  |
| C5-C7                  | 1.43   | 1.35            | 6.34  |
| C6-C8                  | 1.47   | 1.47            | 0.13  |
| C6-C9                  | 1.48   | 1.46            | 1.10  |
| C7-C10                 | 1.47   | 1.48            | -0.59 |
| C7-C11                 | 1.52   | 1.49            | 1.93  |
| C8-C12                 | 1.41   | 1.38            | 2.40  |
| C8-C13                 | 1.46   | 1.42            | 2.93  |
| Continued on next page |        |                 |       |

Table S7 – continued from previous page

| Bond    | MD after EM (Å) | DFT (Å) | Diff% |
|---------|-----------------|---------|-------|
| C9-C10  | 1.55            | 1.57    | -1.21 |
| C9-O3   | 1.24            | 1.21    | 2.27  |
| C10-O4  | 1.23            | 1.20    | 1.76  |
| C11-H4  | 1.09            | 1.10    | -0.43 |
| C11-H5  | 1.09            | 1.09    | -0.02 |
| C11-H6  | 1.08            | 1.09    | -0.83 |
| C12-O5  | 1.37            | 1.35    | 1.31  |
| C12-C14 | 1.42            | 1.42    | 0.35  |
| C13-C15 | 1.43            | 1.42    | 0.35  |
| C13-C16 | 1.40            | 1.40    | -0.07 |
| O5-H7   | 0.95            | 0.96    | -1.17 |
| C14-O6  | 1.37            | 1.34    | 2.64  |
| C14-C17 | 1.42            | 1.40    | 1.49  |
| C15-H8  | 1.08            | 1.08    | 0.29  |
| C15-C18 | 1.37            | 1.36    | 0.11  |
| C16-C17 | 1.41            | 1.42    | -0.70 |
| C16-N2  | 1.37            | 1.37    | 0.21  |
| O6-H9   | 0.96            | 0.99    | -3.04 |
| C17-C19 | 1.51            | 1.45    | 4.35  |
| C18-N2  | 1.38            | 1.38    | 0     |
| C18-C20 | 1.49            | 1.46    | 2.16  |
| N2-H10  | 1.01            | 1.00    | 0.98  |
| C19-C21 | 1.50            | 1.49    | 0.38  |
| C19-O2  | 1.23            | 1.24    | -0.62 |
| C20-O8  | 1.35            | 1.36    | -0.87 |
| C20-O9  | 1.22            | 1.19    | 2.22  |
| C21-C22 | 1.44            | 1.41    | 1.97  |
| C21-C23 | 1.38            | 1.39    | -1.09 |
| O8-H11  | 0.95            | 0.96    | -1.04 |
| H12-C22 | 1.08            | 1.08    | 0.16  |
| C22-C24 | 1.37            | 1.38    | -0.79 |
| C23-C25 | 1.5             | 1.472   | 1.90  |
| C23-N3  | 1.37            | 1.36    | 0.84  |
| C24-N3  | 1.37            | 1.36    | 1.06  |
| C24-C26 | 1.49            | 1.47    | 1.62  |
| C25-O10 | 1.36            | 1.35    | 0.90  |
| C25-O11 | 1.22            | 1.19    | 2.81  |
| N3-H13  | 1.01            | 1.01    | 0.56  |
| C26-O12 | 1.36            | 1.35    | 0.53  |
| C26-O13 | 1.23            | 1.20    | 1.76  |
| O10-H14 | 0.95            | 0.96    | -1.66 |
| O12-H15 | 0.94            | 0.96    | -1.78 |

Table S8: Comparison of angle degrees calculated using DFT and MD simulations after EM ensemble of DHICA-eumelanin.

| Angle                  | DFT(deg.) | MD after EM (deg.) | Diff% |
|------------------------|-----------|--------------------|-------|
| C1-N1-H1               | 125.79    | 124.99             | 0.63  |
| C1-N1-C7               | 106.66    | 109.61             | -2.69 |
| C7-N1-H1               | 127.34    | 125.34             | 1.59  |
| C2-C1-C9               | 124.00    | 126.51             | -1.98 |
| N1-C1-C9               | 124.59    | 122.15             | 1.98  |
| N1-C1-C2               | 111.40    | 111.34             | 0.04  |
| C1-C2-H2               | 124.05    | 125.20             | -0.91 |
| C8-C2-H2               | 128.18    | 127.84             | 0.26  |
| C1-C2-C8               | 107.15    | 106.96             | 0.17  |
| C8-C3-C26              | 120.53    | 125.40             | -3.88 |
| C4-C3-C8               | 114.50    | 117.06             | -2.18 |
| C4-C3-C26              | 121.07    | 117.54             | 3.00  |
| C3-C4-C5               | 123.36    | 119.83             | 2.95  |
| C3-C4-O1               | 125.6     | 121.47             | 3.40  |
| C5-C4-O1               | 110.87    | 118.70             | -6.59 |
| C4-C5-C6               | 115.85    | 118.02             | -1.83 |
| C6-C5-O2               | 120.98    | 124.09             | -2.50 |
| C4-C5-O2               | 123.13    | 117.87             | 4.46  |
| C7-C6-C12              | 124.12    | 122.38             | 1.42  |
| C5-C6-C7               | 117.70    | 116.85             | 0.72  |
| C5-C6-C12              | 118.17    | 120.75             | -2.13 |
| N1-C7-C8               | 109.25    | 106.17             | 2.90  |
| N1-C7-C6               | 123.89    | 128.16             | -3.33 |
| C6-C7-C8               | 126.83    | 125.67             | 0.92  |
| C2-C8-C7               | 104.42    | 105.91             | -1.41 |
| C2-C8-C3               | 135.49    | 131.62             | 2.93  |
| C3-C8-C7               | 119.22    | 122.46             | -2.64 |
| O3-C9-O4               | 121.78    | 123.93             | -1.73 |
| C1-C9-O3               | 114.52    | 111.42             | 2.78  |
| C1-C9-O4               | 123.00    | 124.65             | -1.32 |
| C9-O4-H3               | 106.87    | 107.16             | -0.26 |
| C10-N2-C16             | 109.33    | 109.33             | 0.00  |
| C16-N2-H4              | 130.83    | 126.63             | 3.31  |
| C10-N2-H4              | 119.37    | 123.83             | -3.60 |
| N2-C10-C11             | 109.45    | 109.20             | 0.22  |
| C11-C10-C18            | 124.64    | 128.62             | -3.09 |
| N2-C10-C18             | 124.97    | 122.17             | 2.29  |
| C17-C11-H5             | 125.18    | 127.91             | -2.13 |
| C10-C11-H5             | 127.59    | 125.37             | 1.77  |
| C10-C11-C17            | 105.94    | 106.72             | -0.73 |
| Continued on next page |           |                    |       |

Table S8 – continued from previous page

| Angle       | MD after EM (deg.) | DFT (deg.) | Diff% |
|-------------|--------------------|------------|-------|
| C6-C12-C13  | 121.52             | 120.83     | 0.57  |
| C6-C12-C17  | 124.50             | 121.09     | 2.81  |
| C13-C12-C17 | 113.98             | 118.08     | -3.47 |
| C12-C13-O5  | 121.52             | 120.66     | 0.71  |
| C14-C13-O5  | 111.80             | 118.48     | -5.63 |
| C12-C13-C14 | 126.23             | 120.83     | 4.47  |
| C13-C14-O6  | 117.00             | 114.23     | 2.42  |
| C15-C14-O6  | 123.01             | 123.12     | -0.08 |
| C13-C14-C15 | 119.66             | 122.63     | -2.41 |
| C14-C15-C16 | 112.08             | 115.85     | -3.25 |
| C14-C15-C25 | 125.71             | 118.30     | 6.26  |
| C16-C15-C25 | 121.97             | 125.81     | -3.04 |
| C15-C16-C17 | 128.68             | 121.70     | 5.73  |
| N2-C16-C15  | 123.32             | 130.88     | -5.78 |
| N2-C16-C17  | 107.51             | 107.39     | 0.11  |
| C11-C17-C12 | 132.96             | 131.75     | 0.92  |
| C12-C17-C16 | 118.13             | 120.86     | -2.26 |
| C11-C17-C16 | 107.76             | 107.36     | 0.36  |
| C13-O5-H7   | 106.78             | 107.96     | -1.09 |
| C14-O6-H8   | 115.16             | 107.29     | 7.33  |
| C10-C18-O7  | 120.07             | 125.69     | -4.47 |
| O7-C18-O8   | 118.28             | 122.76     | -3.65 |
| C10-C18-O8  | 120.81             | 111.55     | 8.30  |
| C18-O8-H6   | 109.25             | 106.48     | 2.59  |
| C22-N3-H9   | 129.76             | 125.05     | 3.76  |
| C19-N3-H9   | 124.06             | 125.42     | -1.08 |
| C19-N3-C22  | 106.15             | 109.53     | -3.08 |
| N3-C19-C23  | 123.22             | 122.93     | 0.23  |
| N3-C19-C20  | 107.28             | 108.31     | -0.95 |
| C20-C19-C23 | 129.21             | 128.76     | 0.35  |
| C19-C20-H9  | 109.11             | 107.15     | 1.83  |
| C19-C20-H10 | 126.46             | 125.66     | 0.63  |
| C21-C20-H10 | 122.41             | 127.19     | -3.76 |
| C20-C21-C22 | 106.11             | 107.05     | -0.87 |
| C22-C21-C25 | 131.68             | 127.95     | 2.91  |
| C20-C21-C25 | 122.15             | 124.93     | -2.22 |
| N3-C22-C24  | 123.09             | 122.24     | 0.69  |
| C21-C22-C24 | 125.63             | 129.80     | -3.20 |
| N3-C22-H9   | 111.11             | 107.96     | 2.92  |
| C19-C23-O10 | 119.21             | 111.32     | 7.08  |
| O9-C23-O10  | 120.32             | 123.80     | -2.80 |
| C19-C23-O9  | 120.45             | 124.88     | -3.54 |

Continued on next page

Table S8 – continued from previous page

| Angle       | MD after EM (deg.) | DFT (deg.) | Diff% |
|-------------|--------------------|------------|-------|
| C23-O10-H11 | 114.14             | 107.15     | 6.52  |
| O11-C24-O12 | 119.09             | 123.65     | -3.69 |
| C22-C24-O11 | 119.32             | 125.22     | -4.71 |
| C22-C24-O12 | 121.52             | 111.13     | 9.34  |
| C24-O12-H12 | 103.78             | 107.10     | -3.10 |
| C15-C25-C21 | 121.07             | 120.51     | 0.46  |
| C21-C25-O13 | 122.70             | 117.31     | 4.59  |
| C15-C25-O13 | 116.22             | 122.17     | -4.87 |
| H14-C26-H15 | 103.80             | 106.41     | -2.45 |
| H13-C26-H15 | 114.65             | 108.99     | 5.19  |
| C3-C26-H15  | 106.35             | 110.21     | -3.49 |
| H13-C26-H14 | 106.56             | 108.92     | -2.17 |
| C3-C26-H14  | 111.50             | 110.14     | 1.23  |
| C3-C26-H13  | 113.61             | 111.99     | 1.44  |
